# Supplementary material for: 1,2-Dichloroethane induced nephrotoxicity through ROS mediated apoptosis in vitro and in vivo
Source: Royal Society of Chemistry journal article supplement (doi:10.1039/c5tx00056d), 2015-01-01
Supplement: c5tx00056d1.pdf [file c5tx00056d1.pdf]

**Supplementary table 1** DCE vapor concentration of inhalation chambers were determined by gas chromatography at indicated time interval.

| Monitoring time<br>minutes | DCE (ppm)     |               |                |
|----------------------------|---------------|---------------|----------------|
|                            | 333 ppm group | 557 ppm group | 1000 ppm group |
| 15                         | 333           | 554           | 1033           |
| 30                         | 326           | 546           | 997            |
| 45                         | 330           | 550           | 984            |
| 60                         | 327           | 556           | 1005           |
| 75                         | 328           | 548           | 998            |
| 90                         | 324           | 559           | 1001           |
| 105                        | 328           | 541           | 990            |
| 120                        | 319           | 550           | 978            |
| 135                        | 319           | 539           | 988            |
| 150                        | 319           | 546           | 1014           |
| 165                        | 318           | 536           | 983            |
| 180                        | 316           | 544           | 1006           |
| 195                        | 313           | 537           | 998            |
| 210                        | 319           | 533           | 1000           |
| 225                        | 311           | 546           | 958            |
| 240                        | 312           | 543           | 976            |
| 255                        | 313           | 528           | 968            |
| 270                        | 308           | 536           | 997            |
| 285                        | 314           | 540           | 977            |
| 300                        | 309           | 543           | 979            |
| 315                        | 314           | 530           | 946            |
| 330                        | 308           | 533           | 964            |
| 345                        | 302           | 536           | 948            |
| 360                        | 305           | 526           | 959            |
